# Supplementary material for: Synchronous Surgical Treatment of Lower Eyelid Involutional Entropion and Ptosis
Source: Case Rep Ophthalmol Med. 2018 Nov 11;2018:2478646. doi: 10.1155/2018/2478646 (PMC6252241; doi:10.1155/2018/2478646)
Supplement: Supplementary Materials — (1) Preoperative clinical picture of the patient showing moderate upper eyelid ptosis and lower eyelid entropion. (2) Clinical picture of the patient 2 years postoperatively demonstrating successful and enduring anatomical and functional restoration of the upper and lower eyelids. [file 2478646.f1.zip]

Archive with 2 entries (2 files):
- 1.pre-operative clinical picture of the patient.jpeg
- 2.clinical picture of the patient after 2 years.jpeg
